# Supplementary material
Source: publisher site journal article supplement (https://www.dovepress.com/get_supplementary_file.php?f=382136.docx)

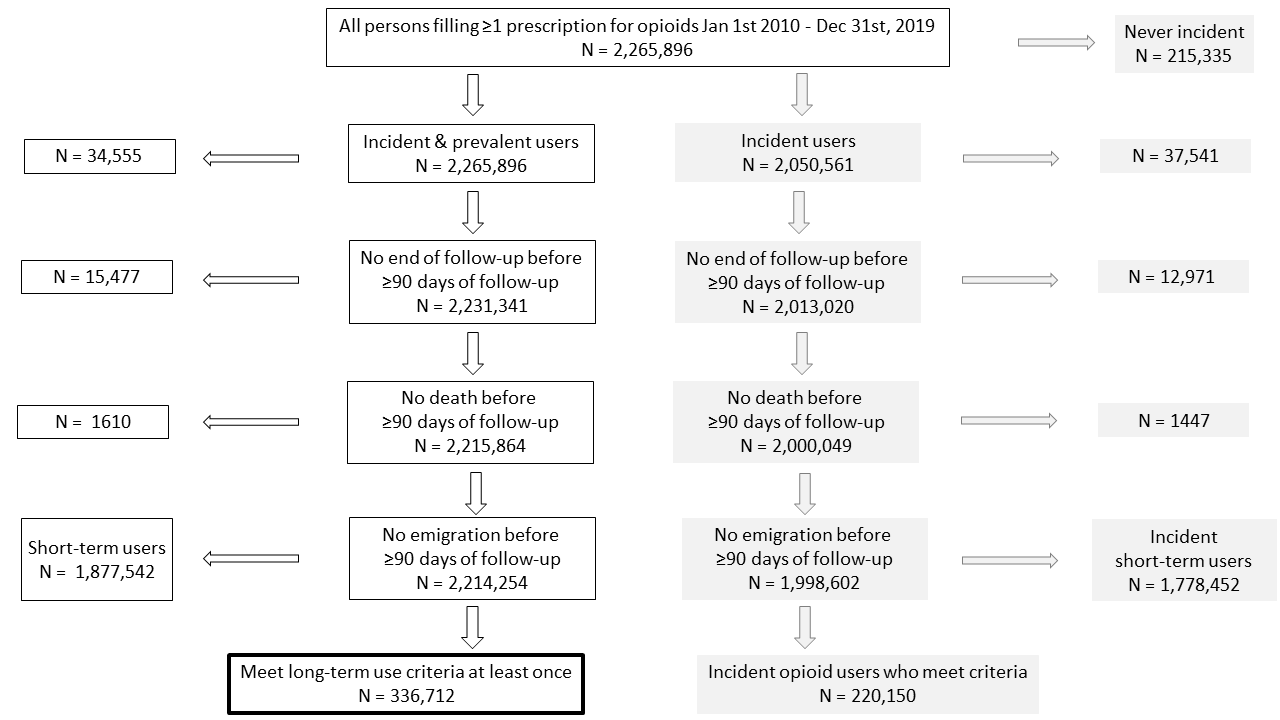


Supplemental Figure 1. Formation of the long-term opioid users' cohort.

Supplement: Supplementary file 1 [file get_supplementary_file.php]
